# Supplementary material
Source: publisher figshare collection journal article supplement (https://frontiersin.figshare.com/ndownloader/files/24039050)
Supplement: Supplementary file 1 [file 24039050]

Supporting Information

Aqueous room temperature mono-dehydration of sugar alcohols using functionalized yttrium oxide nanocatalysts

Juncheng Yanga, Yihong Jiaa, Chao Fana, Yu Chengb, Cheng Pana, Benhua Huanga, Xu Mengc, Junjie Zhanga, Aqun Zhenga, Xiaomo Mad, Xiaoyong Lia, Rafael Luque*a,e, Yang Suna*

*aDepartment of Applied Chemistry, School of Science, Xi’an Jiaotong University, No. 28, Xianning West Road, Xi’an 710049, P.R. China*

*bXi’an No.1 Hospital; Shaanxi Institute of Ophthalmology; Shaanxi Key Laboratory of Ophthalmology; Clinical Research center for Ophthalmology Diseases of Shaanxi Province; First Affiliated Hospital of Northwestern University, No. 30, Xi’an City South Street powder lane, Xi’an 710002, P.R. China*

*cSchool of Material Science and Engineering, Xi’an University of Science and Technology, No. 48, Qin Tang Avenue, Xi’an 710600, P.R. China*

*dCollege of Humanities and Social Sciences, Xi’an Jiaotong University, No. 28, Xianning West Road, Xi’an 710049, P.R. China*

*eDepartamento de Quimica Organica, Universidad de Cordoba, Campus de Rabanales, Edificio Marie Curie (C-3), Ctra Nnal IV-A, Km 396, E14014, Cordoba, Spain*

**Table of Contents**

1. Labelling and measuring the micropipes of C1 over a, Fig. 1 (Fig. S1)
2. The statistical analysis of pipe lengths in a of Fig. 1 (Fig. S2)
3. The XPS measurement of Ti 2p region and C 1s region for the synthesized catalysts (Fig. S3)
4. Determination of acid amount of solid catalyst through *n-*butylamine titration
5. Low-angle XRD patterns of powdered samples (Fig. S4)
6. GC-MS example for catalytic dehydration of D-sorbitol (for Table 3, Fig. S5)
7. GC-MS example for catalytic dehydration of D-mannitol (for Table 4, Fig. S6)

Reference

1. Labelling and measuring the micropipes of C1 over a, Fig. 1 (Fig. S1)


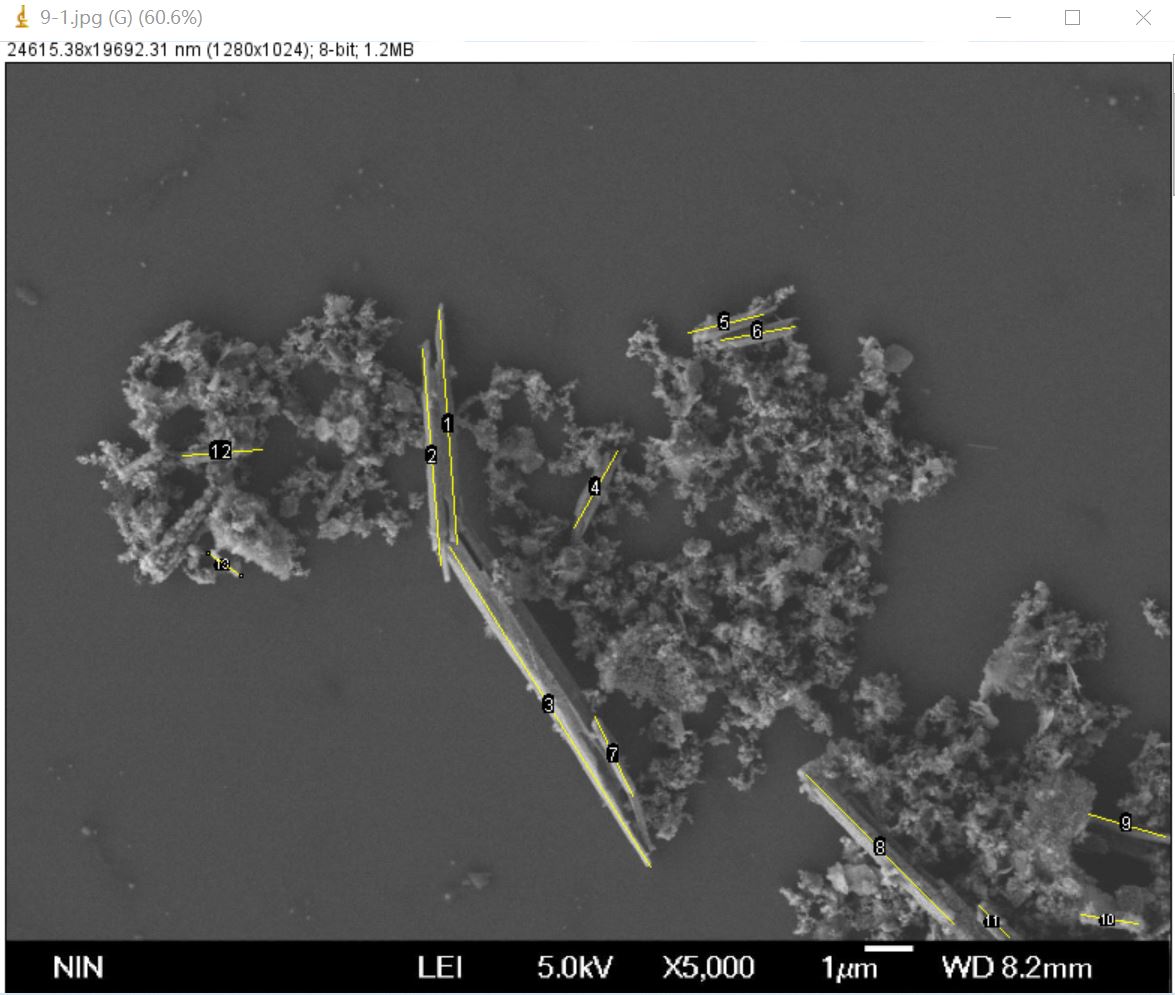


**Fig. S1.** Labelling and measuring the pipes of C1 (over a, Fig. 1)

Notes: ImageJ (public and free soft version) is a suitable software to give a statistic analysis of SEM image. When a of Fig. 1 is selected as a model, and it is effective to evaluate the pipe size distribution of this image.

1. The statistical analysis of pipe lengths in a of Fig. 1 (Fig. S2)


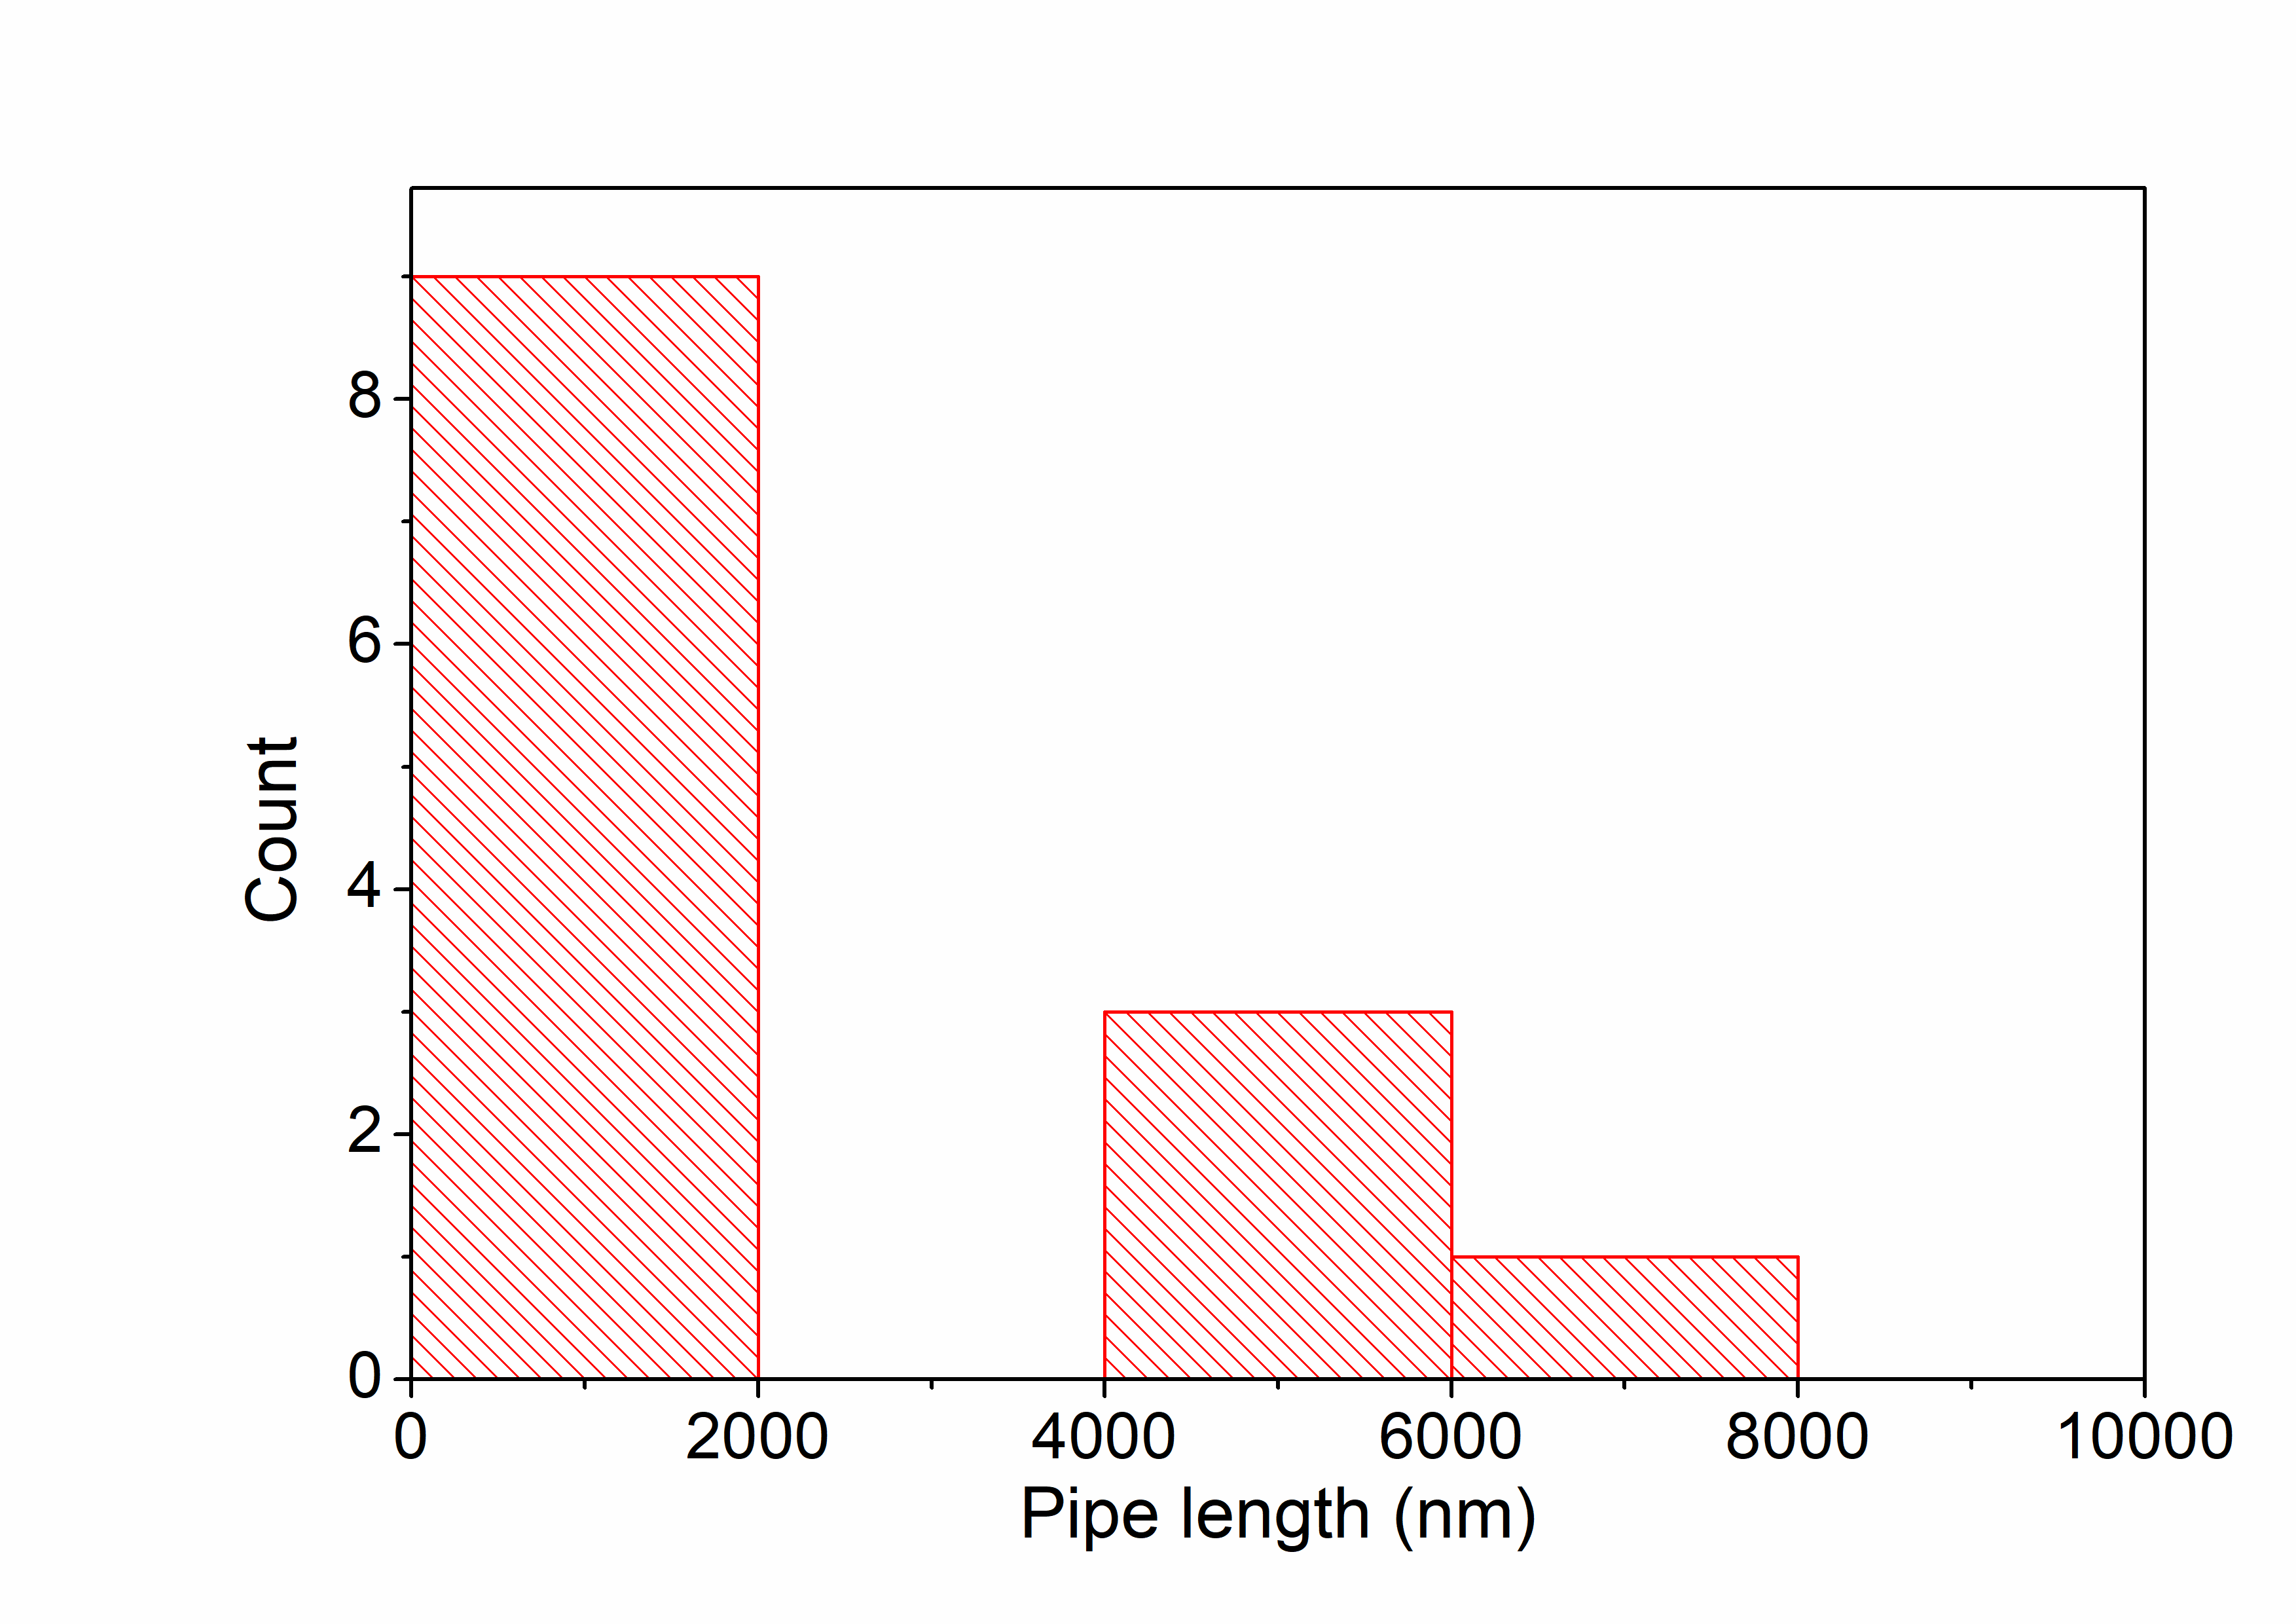


**Fig. S2.** The statistical analysis of pipe lengths in a of Fig. 1

1. The XPS measurement of Ti 2p region and C 1s region for the synthesized catalysts


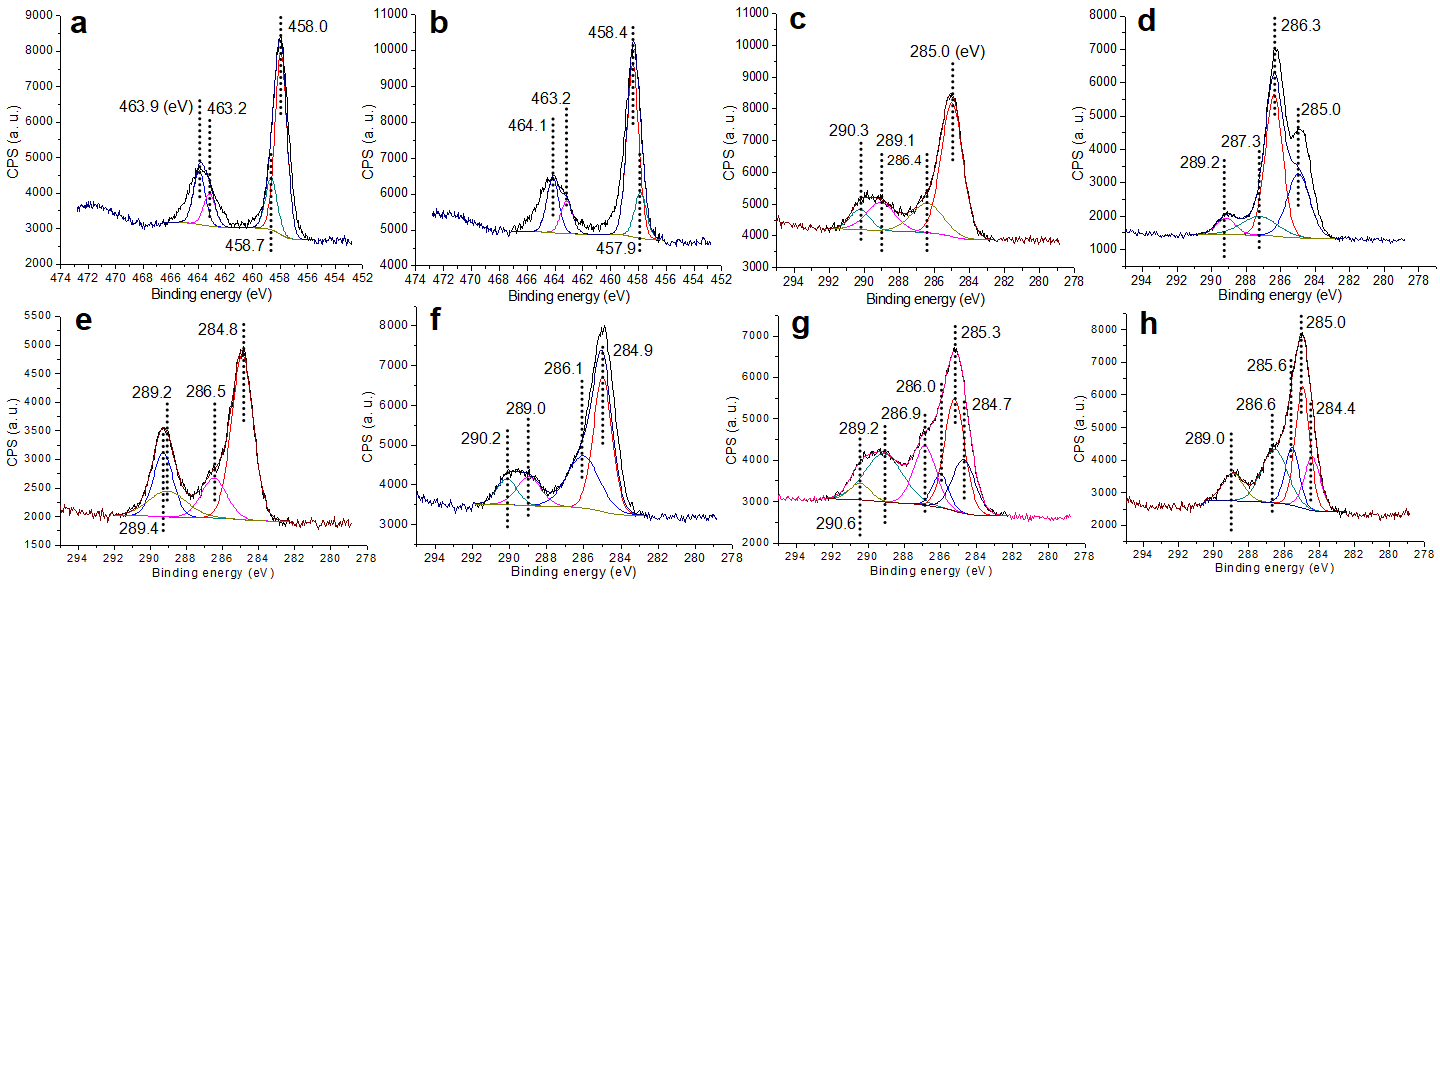


**Fig. S3.** The XPS measurement of Ti 2p region for (a) C3 and (b) C4 as well as that of C 1s region for (c) C1, (d) C2, (e) C3, (f) C4, (g) C1g, and (h) C4g.

1. Determination of acid amount of solid catalyst through *n-*butylamine titration

The acid amount of solid catalyst was determined by *n-*butylamine titration with coeruleum bromocresolis as indicator [a]. In practice, solid sample (300 mg) was combined with *n-*butylamine (0.05 mol L-1, 25.00 mL of toluene solution) into a conical flask (250 mL). After being shaked for 5 min under cover, 2-proponal (100 mL) and coeruleum bromocresolis (1 drop of diluted solution) were added. Then, this mixture was titrated by HCl solution (0.025 mol L-1), and the end point arrived when solution color was changed from blue to yellow. The acid amount of solid sample was the adsorbed amount of *n-*butylamine, which was deduced by subtraction of total *n-*butylamine with the residues in solution that determined by HCl titration.

1. Low-angle XRD patterns of powdered samples


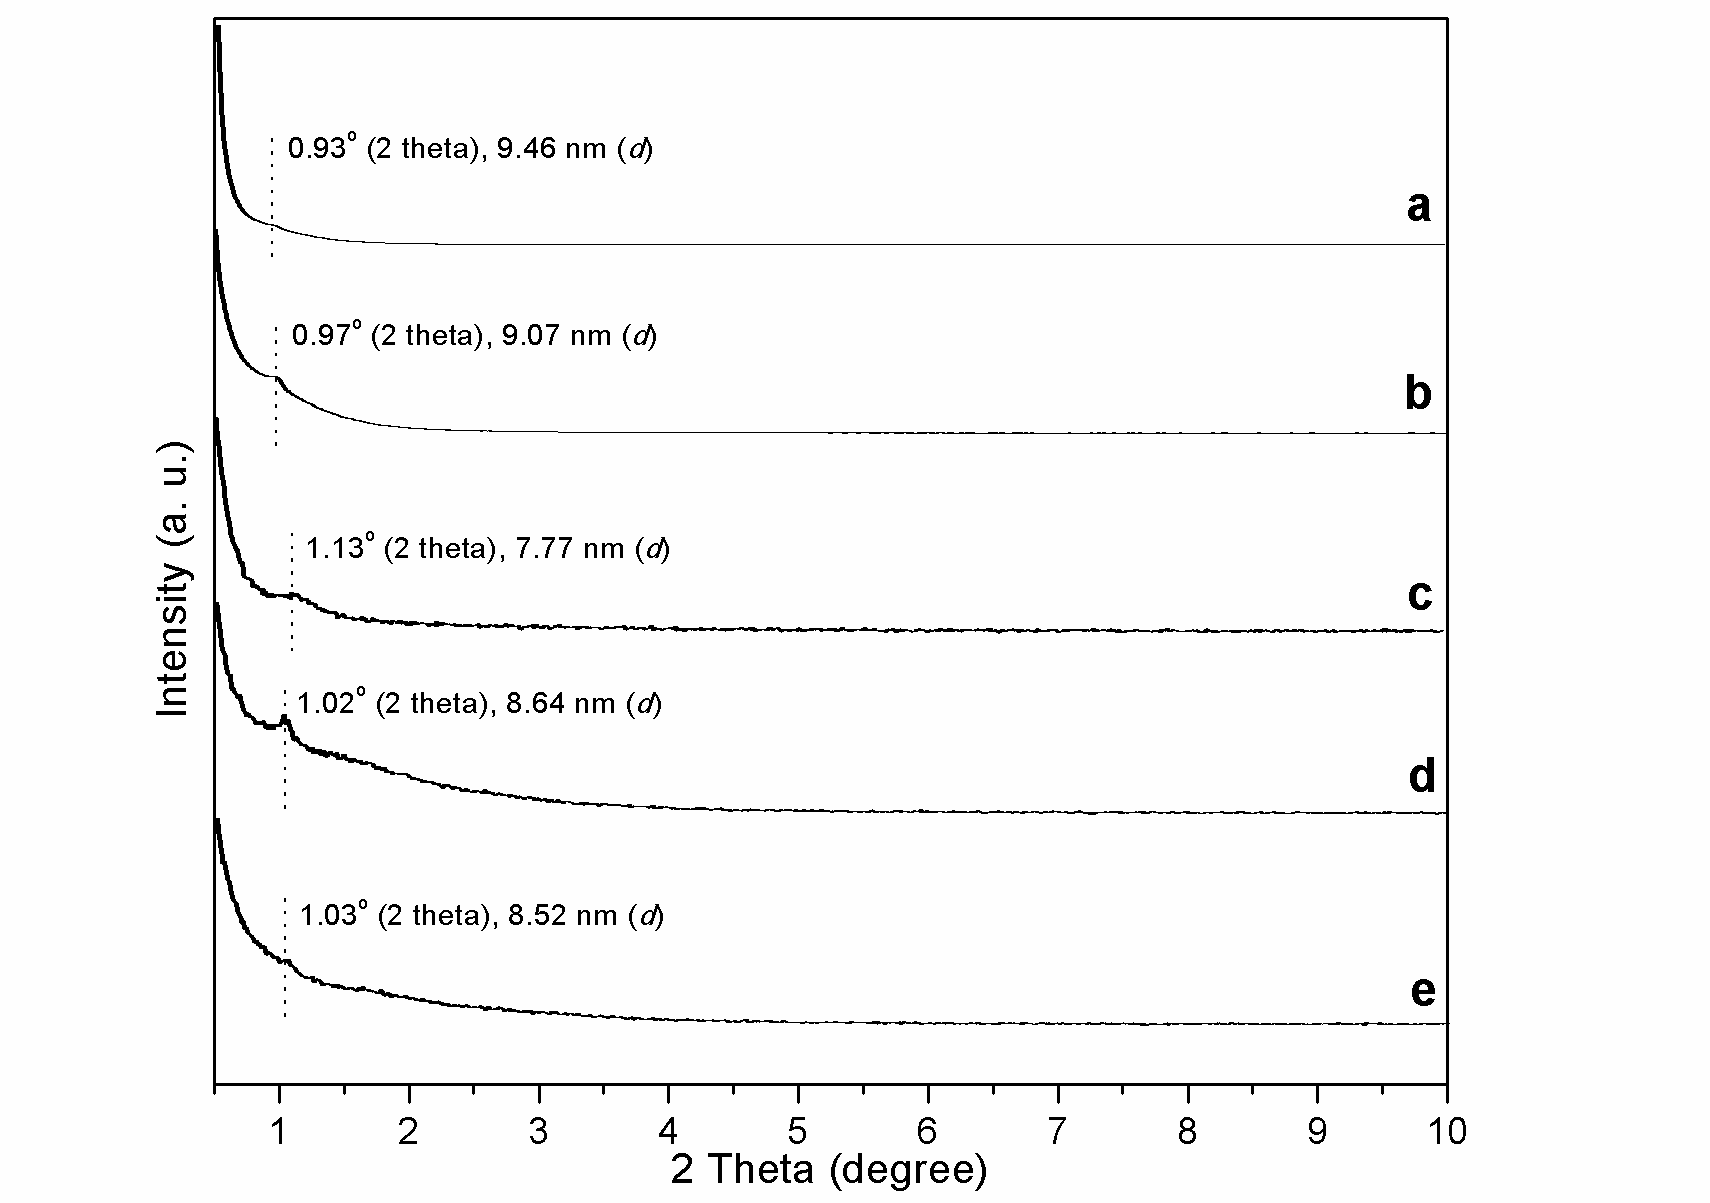


**Fig. S4.** Low-angle XRD patterns of powdered (a) C1, (b) C2, (c) C4, (d) C1g and (e) C4g

1. GC-MS example for catalytic dehydration of D-sorbitol
2. Entry 2, Table 3


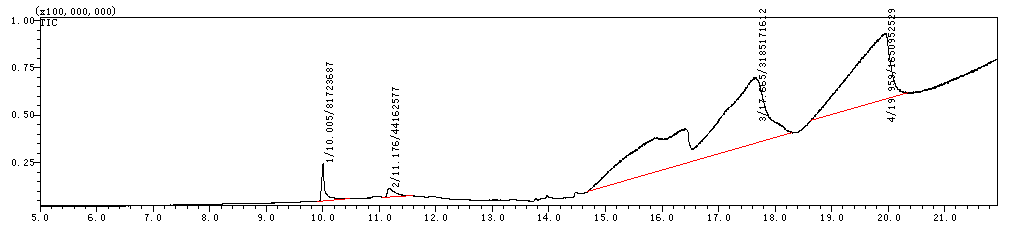


**Fig. S5.** GC part of GC-MS for Entry 2, Table 3.

In this image, data format is peak number / retention time (min) / integral area.

The peak for *t*R = 10.005 min:


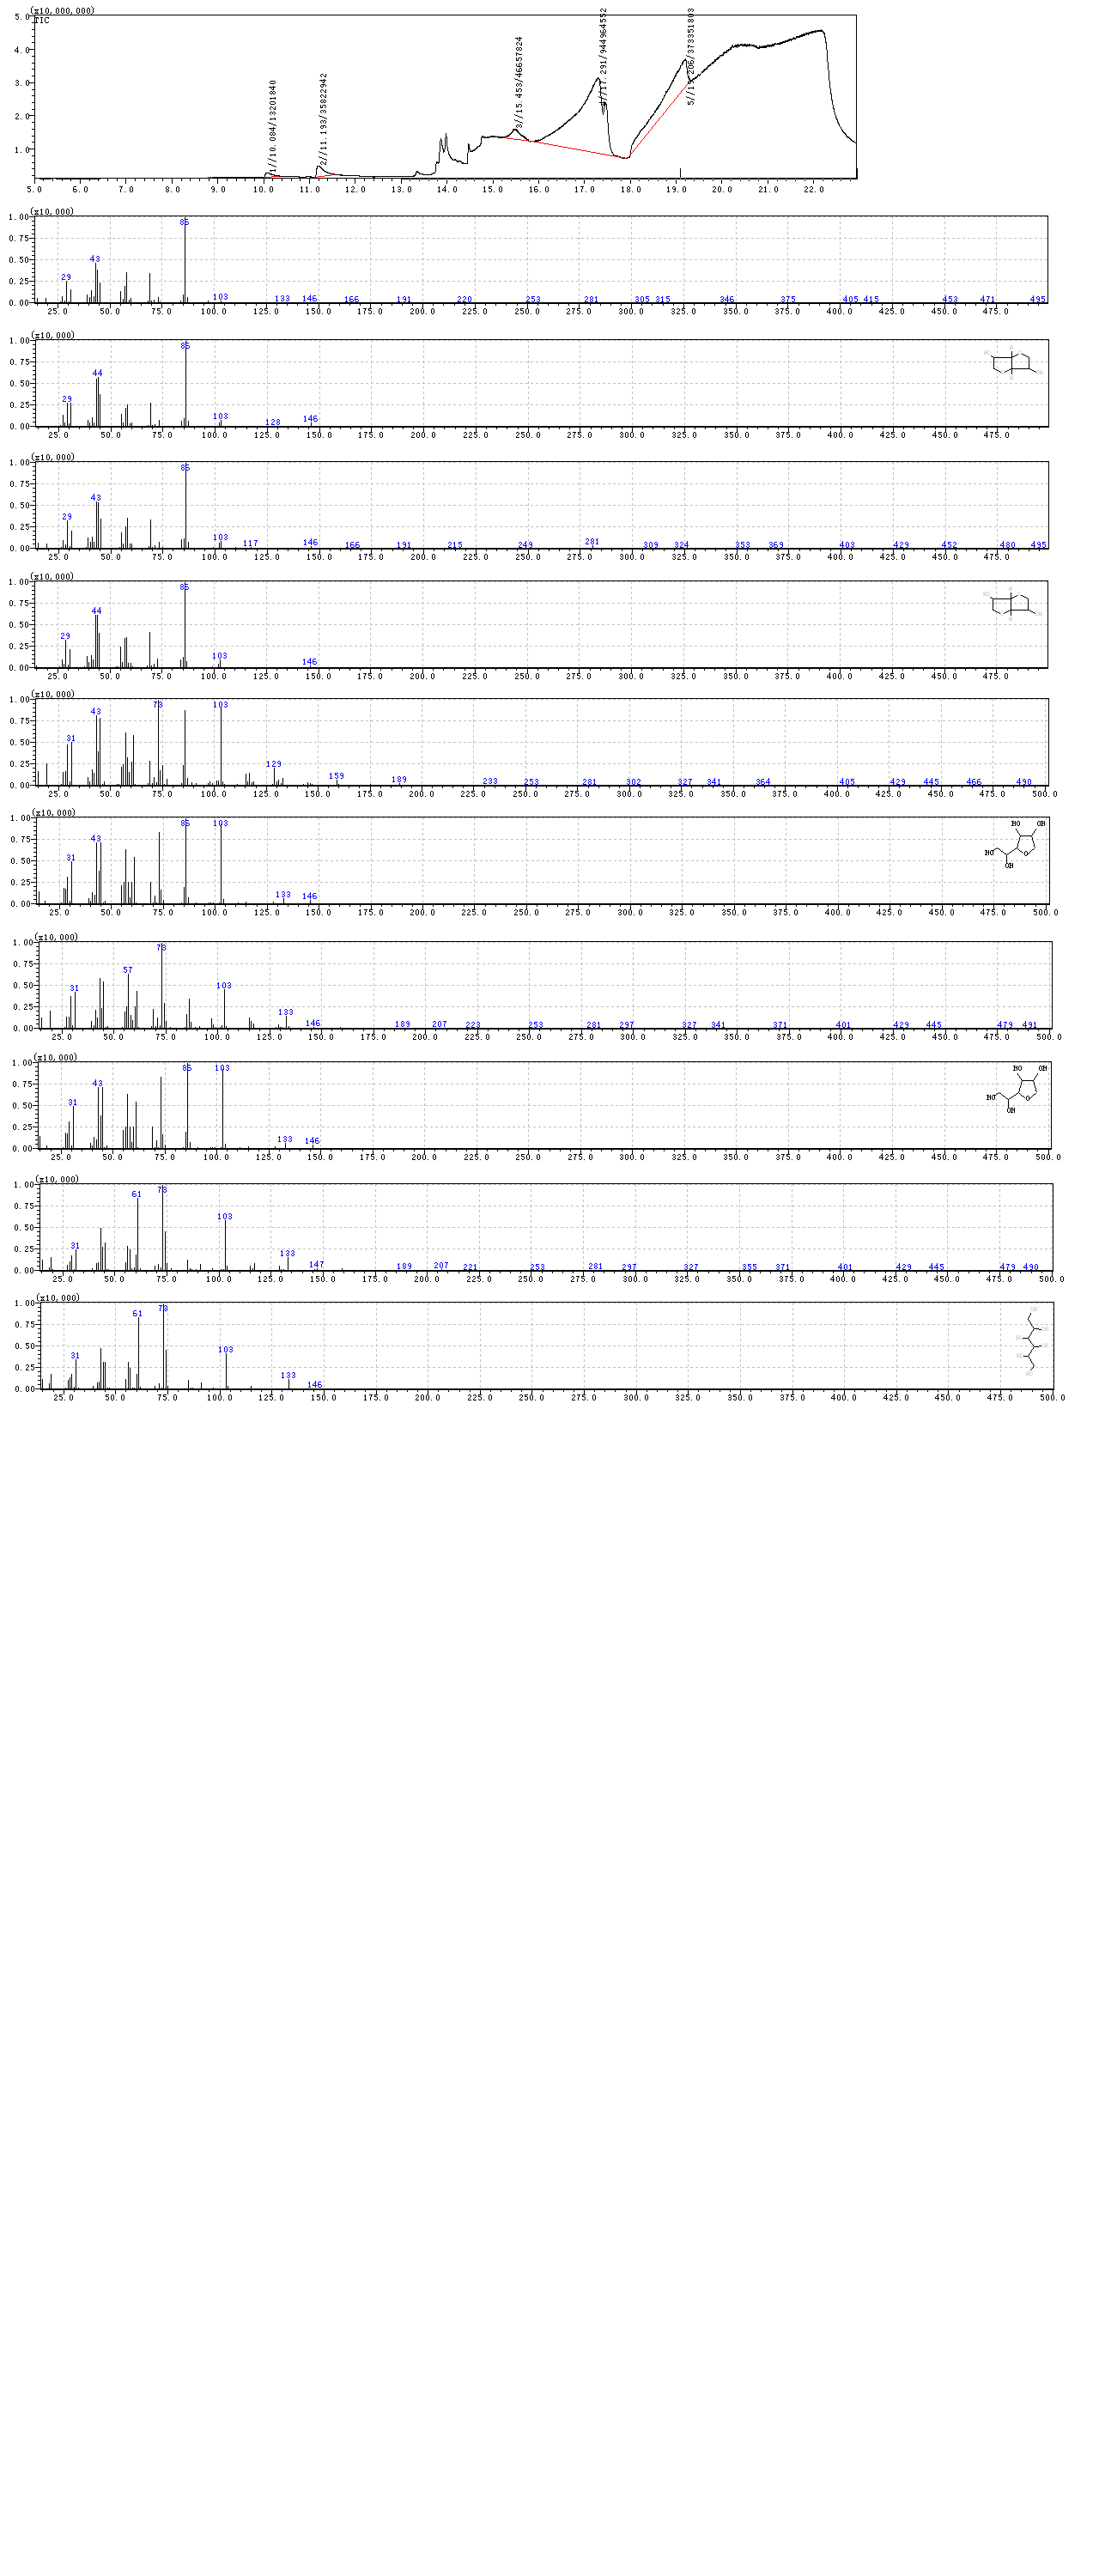


The upper is the real GC-MS chromatograph, the lower is the reference form in GC-MS library. GC-MS: calcd. for C6H10O4 146, found 146 (C6H10O4). Isosorbide.

The peak for *t*R = 11.176 min:


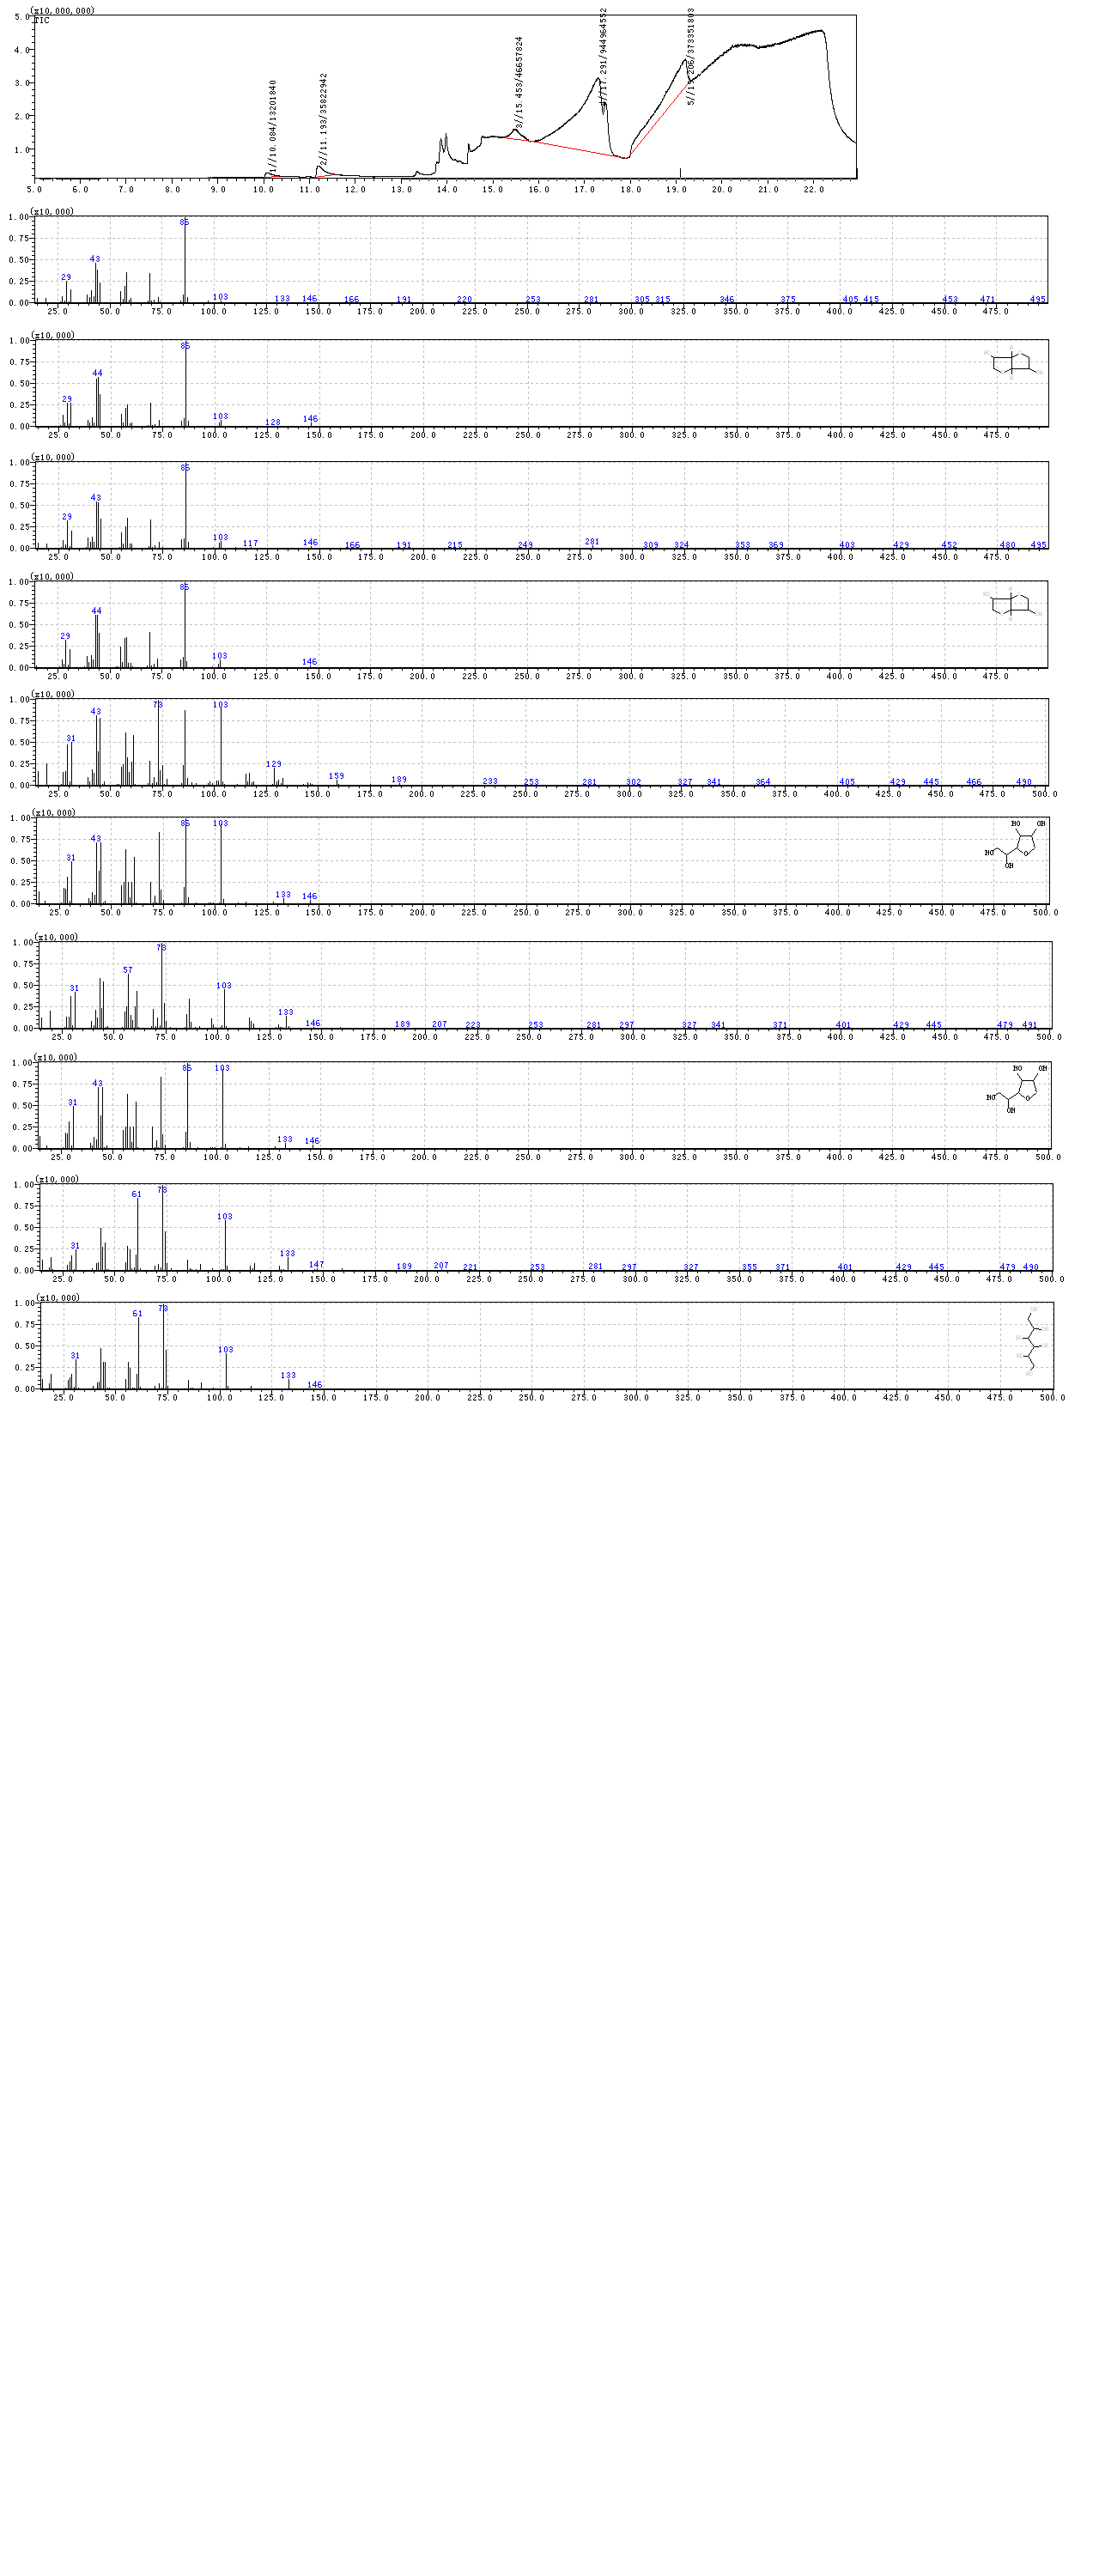


GC-MS: calcd. for C6H10O4 146, found 146 (C6H10O4). Isosorbide.

The peak for *t*R = 17.665 min:


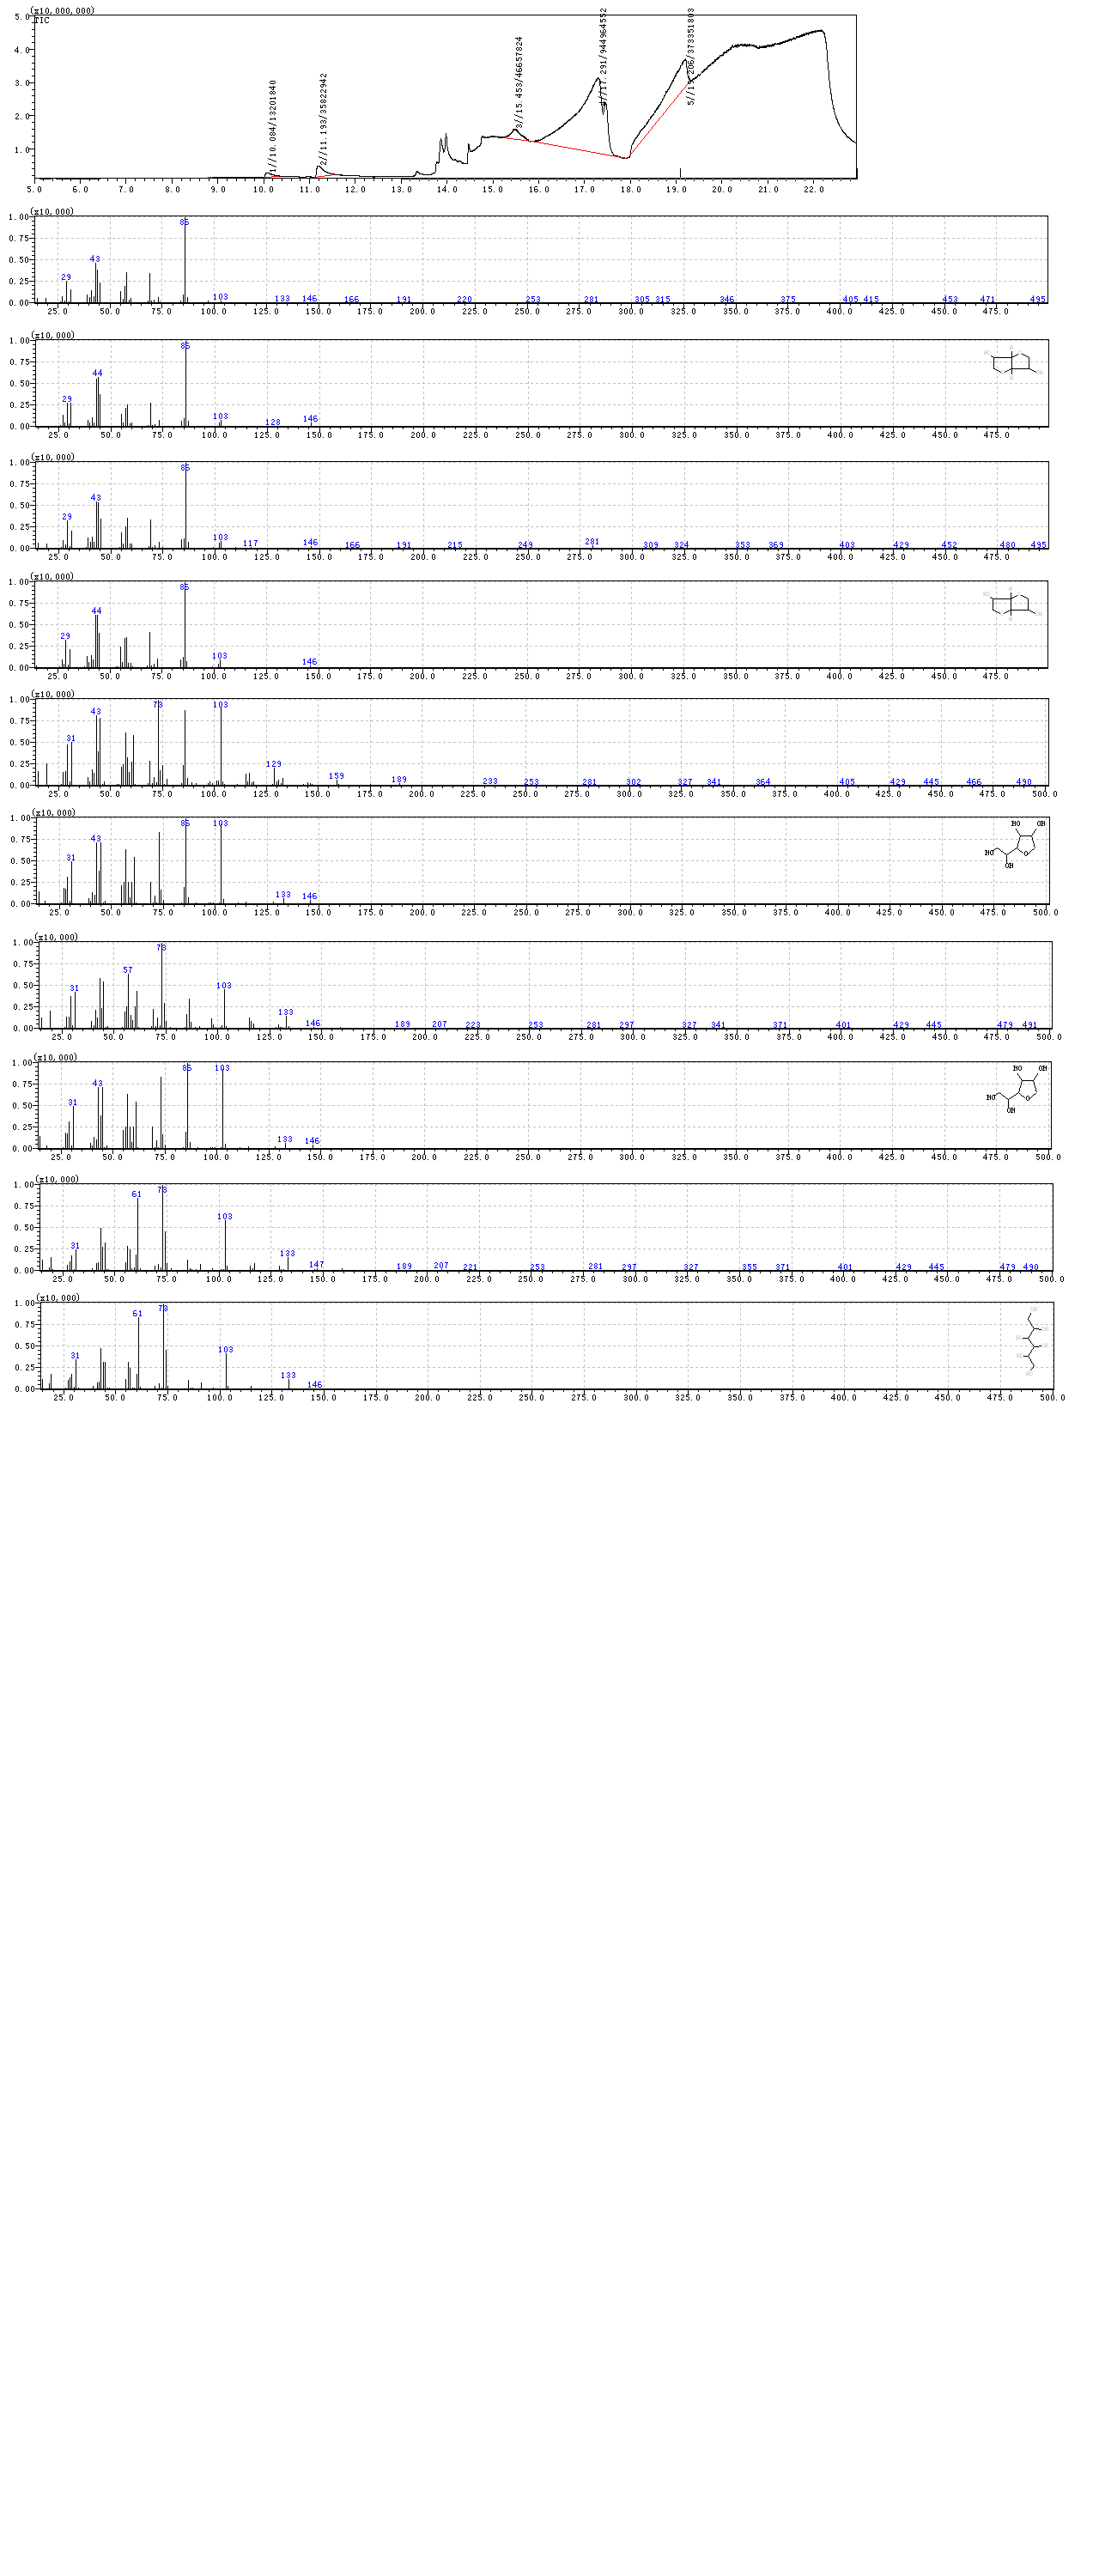


GC-MS: calcd. for C6H12O5 164, found 146 (C6H12O5 – H2O). 1,4-Sorbitan.

The peak for *t*R = 19.959 min:


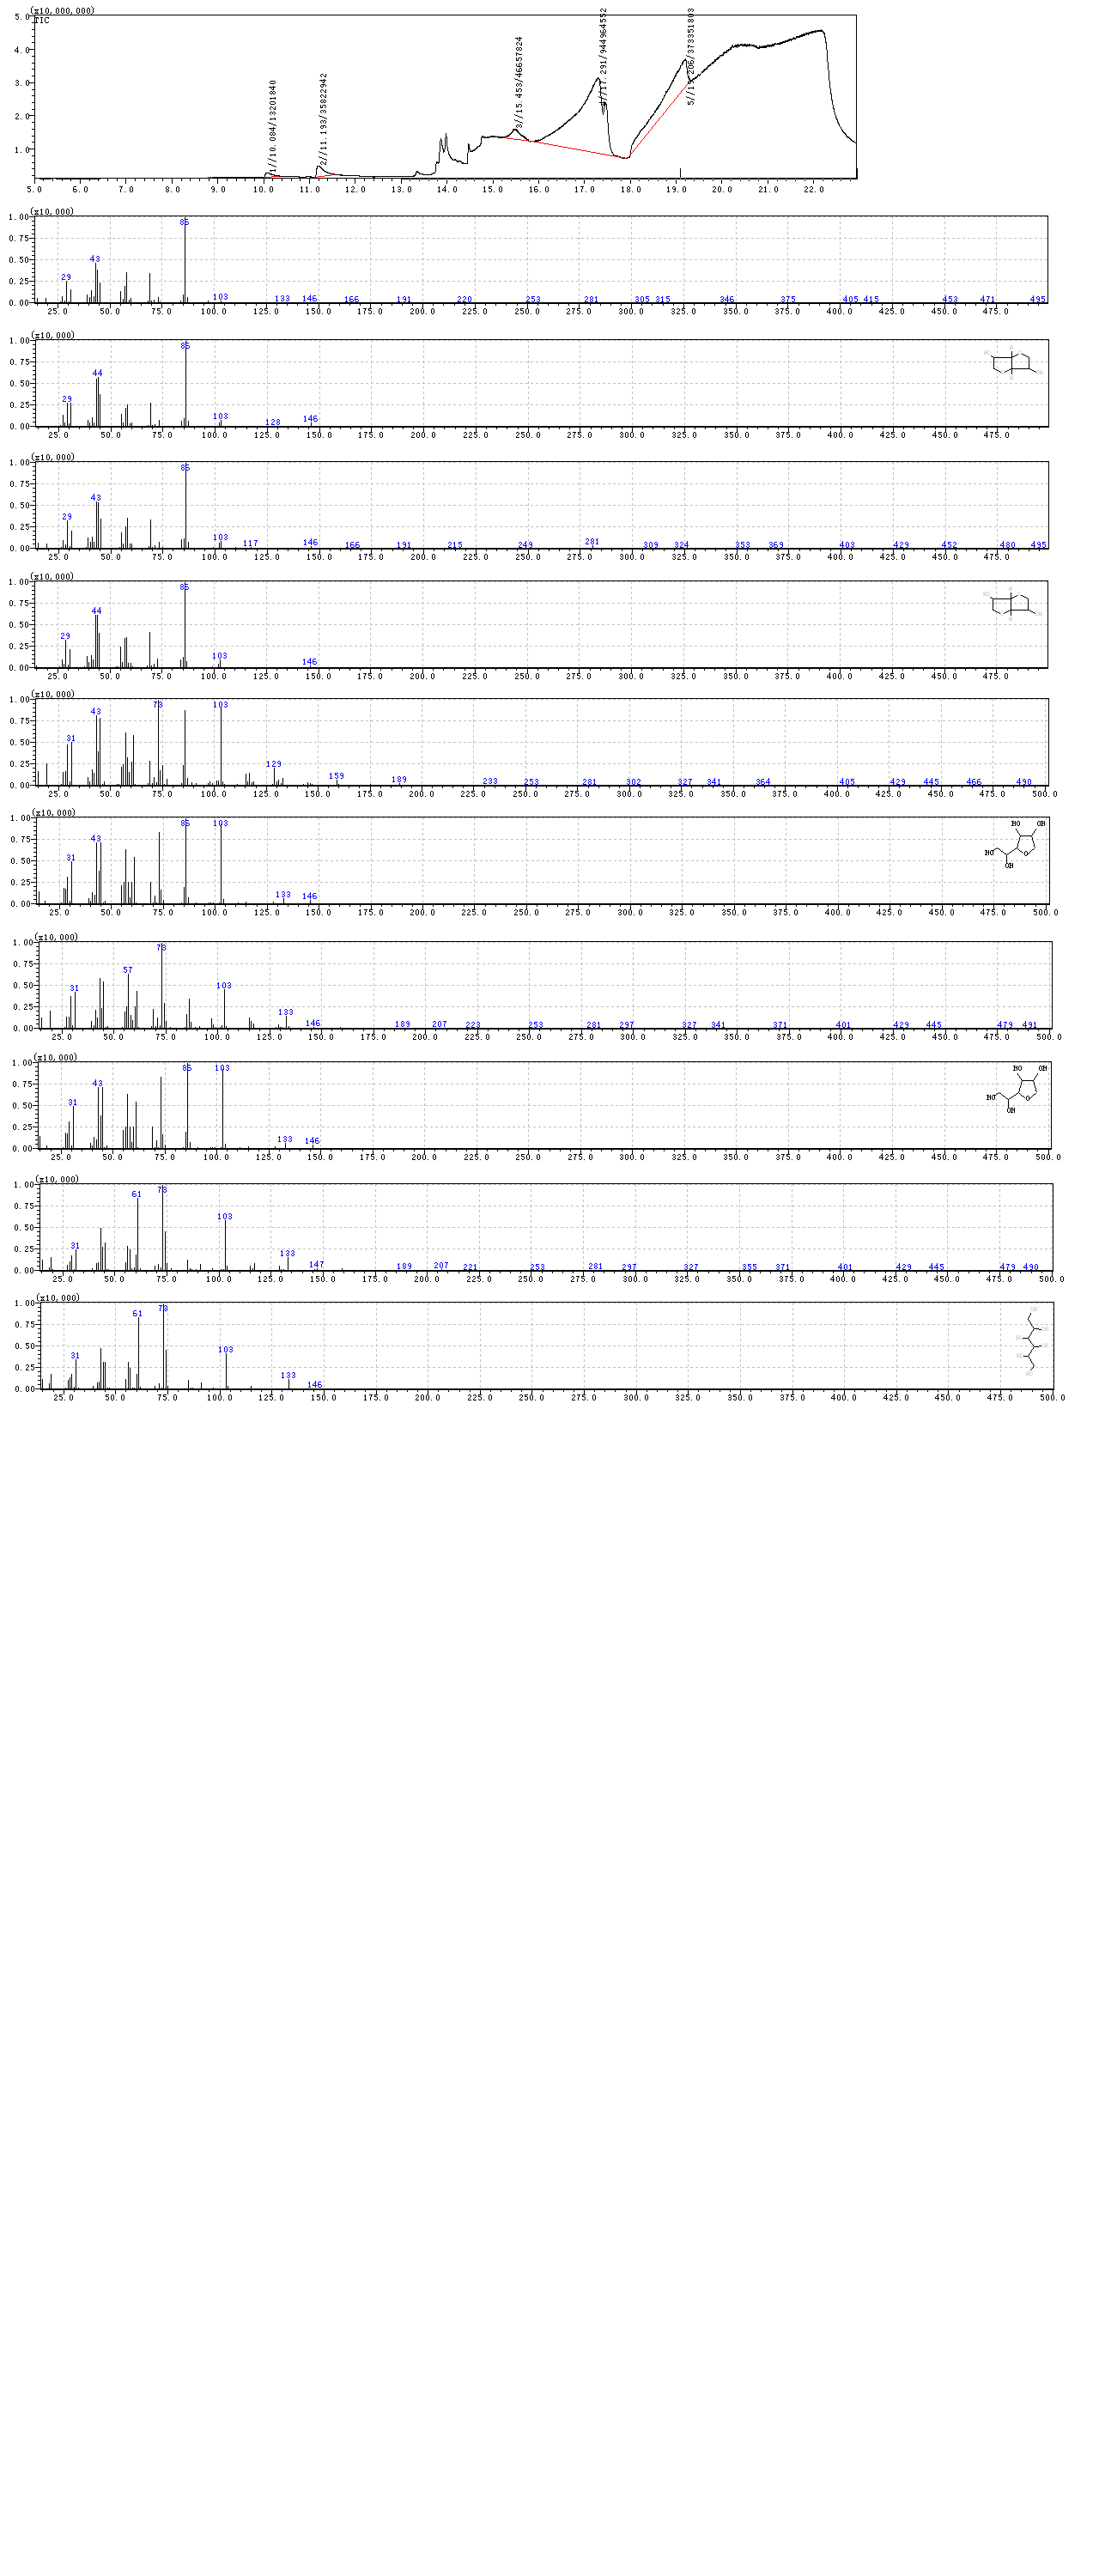


GC-MS: calcd. for C6H14O6 182, found 147 (C6H14O6 – H2O - OH). The unreacted D-sorbitol.

1. GC-MS example for catalytic dehydration of D-mannitol
2. Entry 1, Table 4


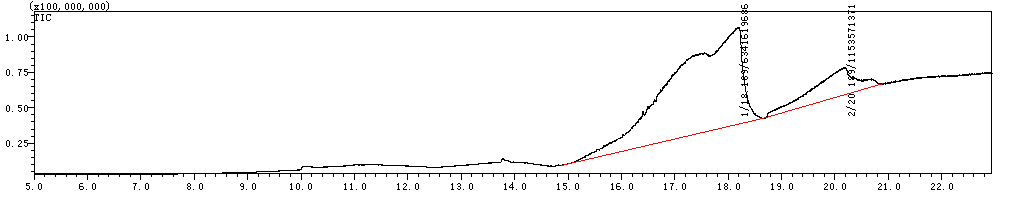


**Fig. S6.** GC part of GC-MS for entry 1, Table 4

The peak at 18.169 min is 1,4-mannitan:


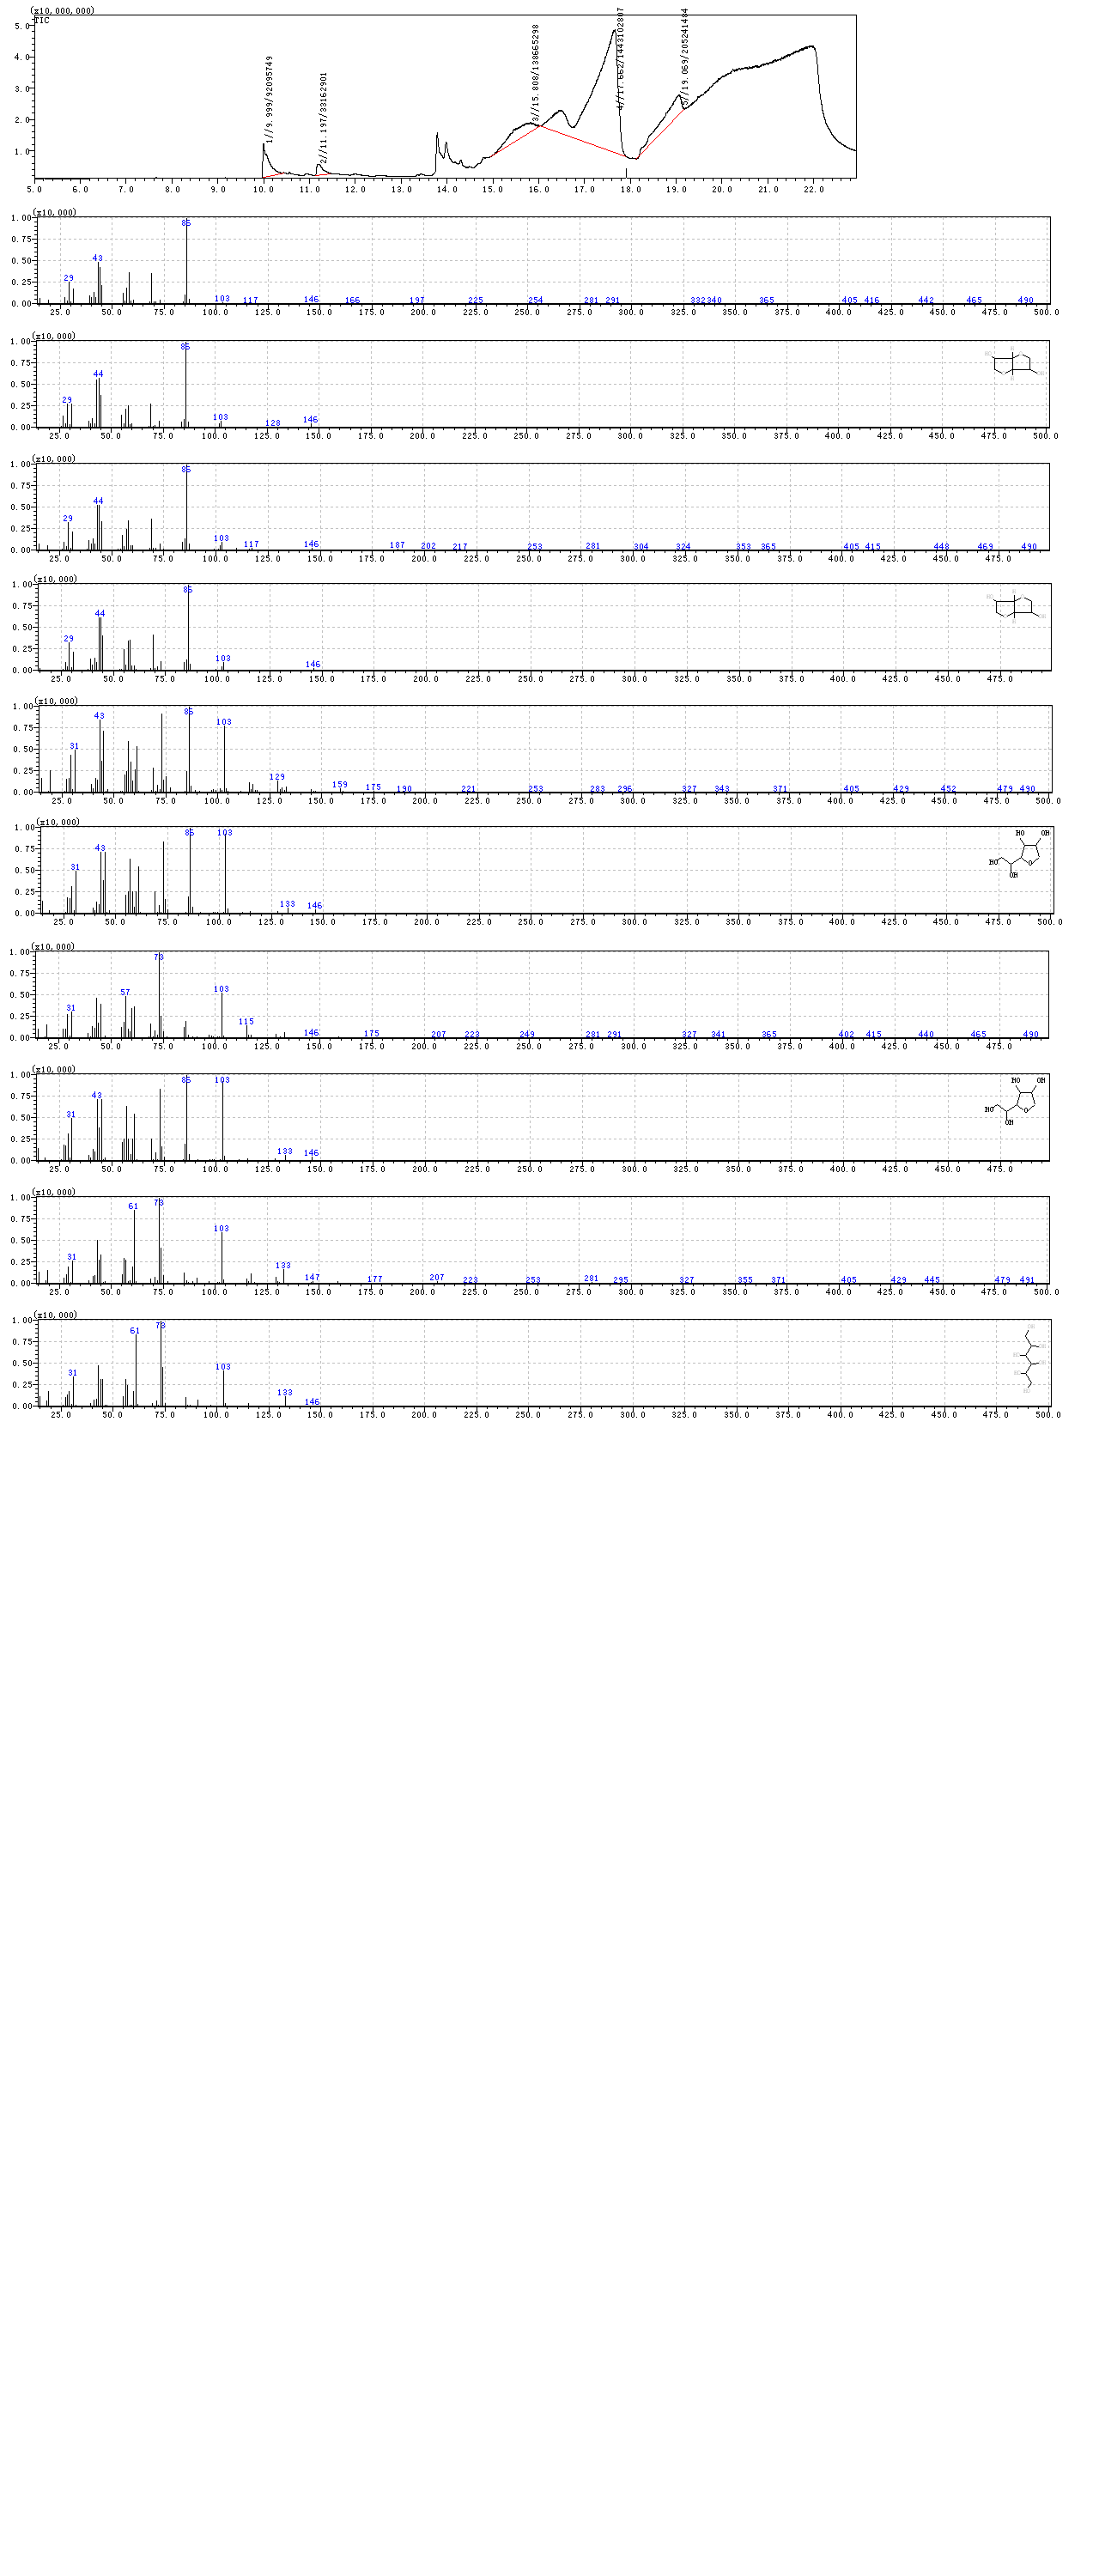


GC-MS: calcd. for C6H12O5 164, found 146 (C6H12O5 – H2O).

That at 20.189 min is the unreacted D-mannitol:


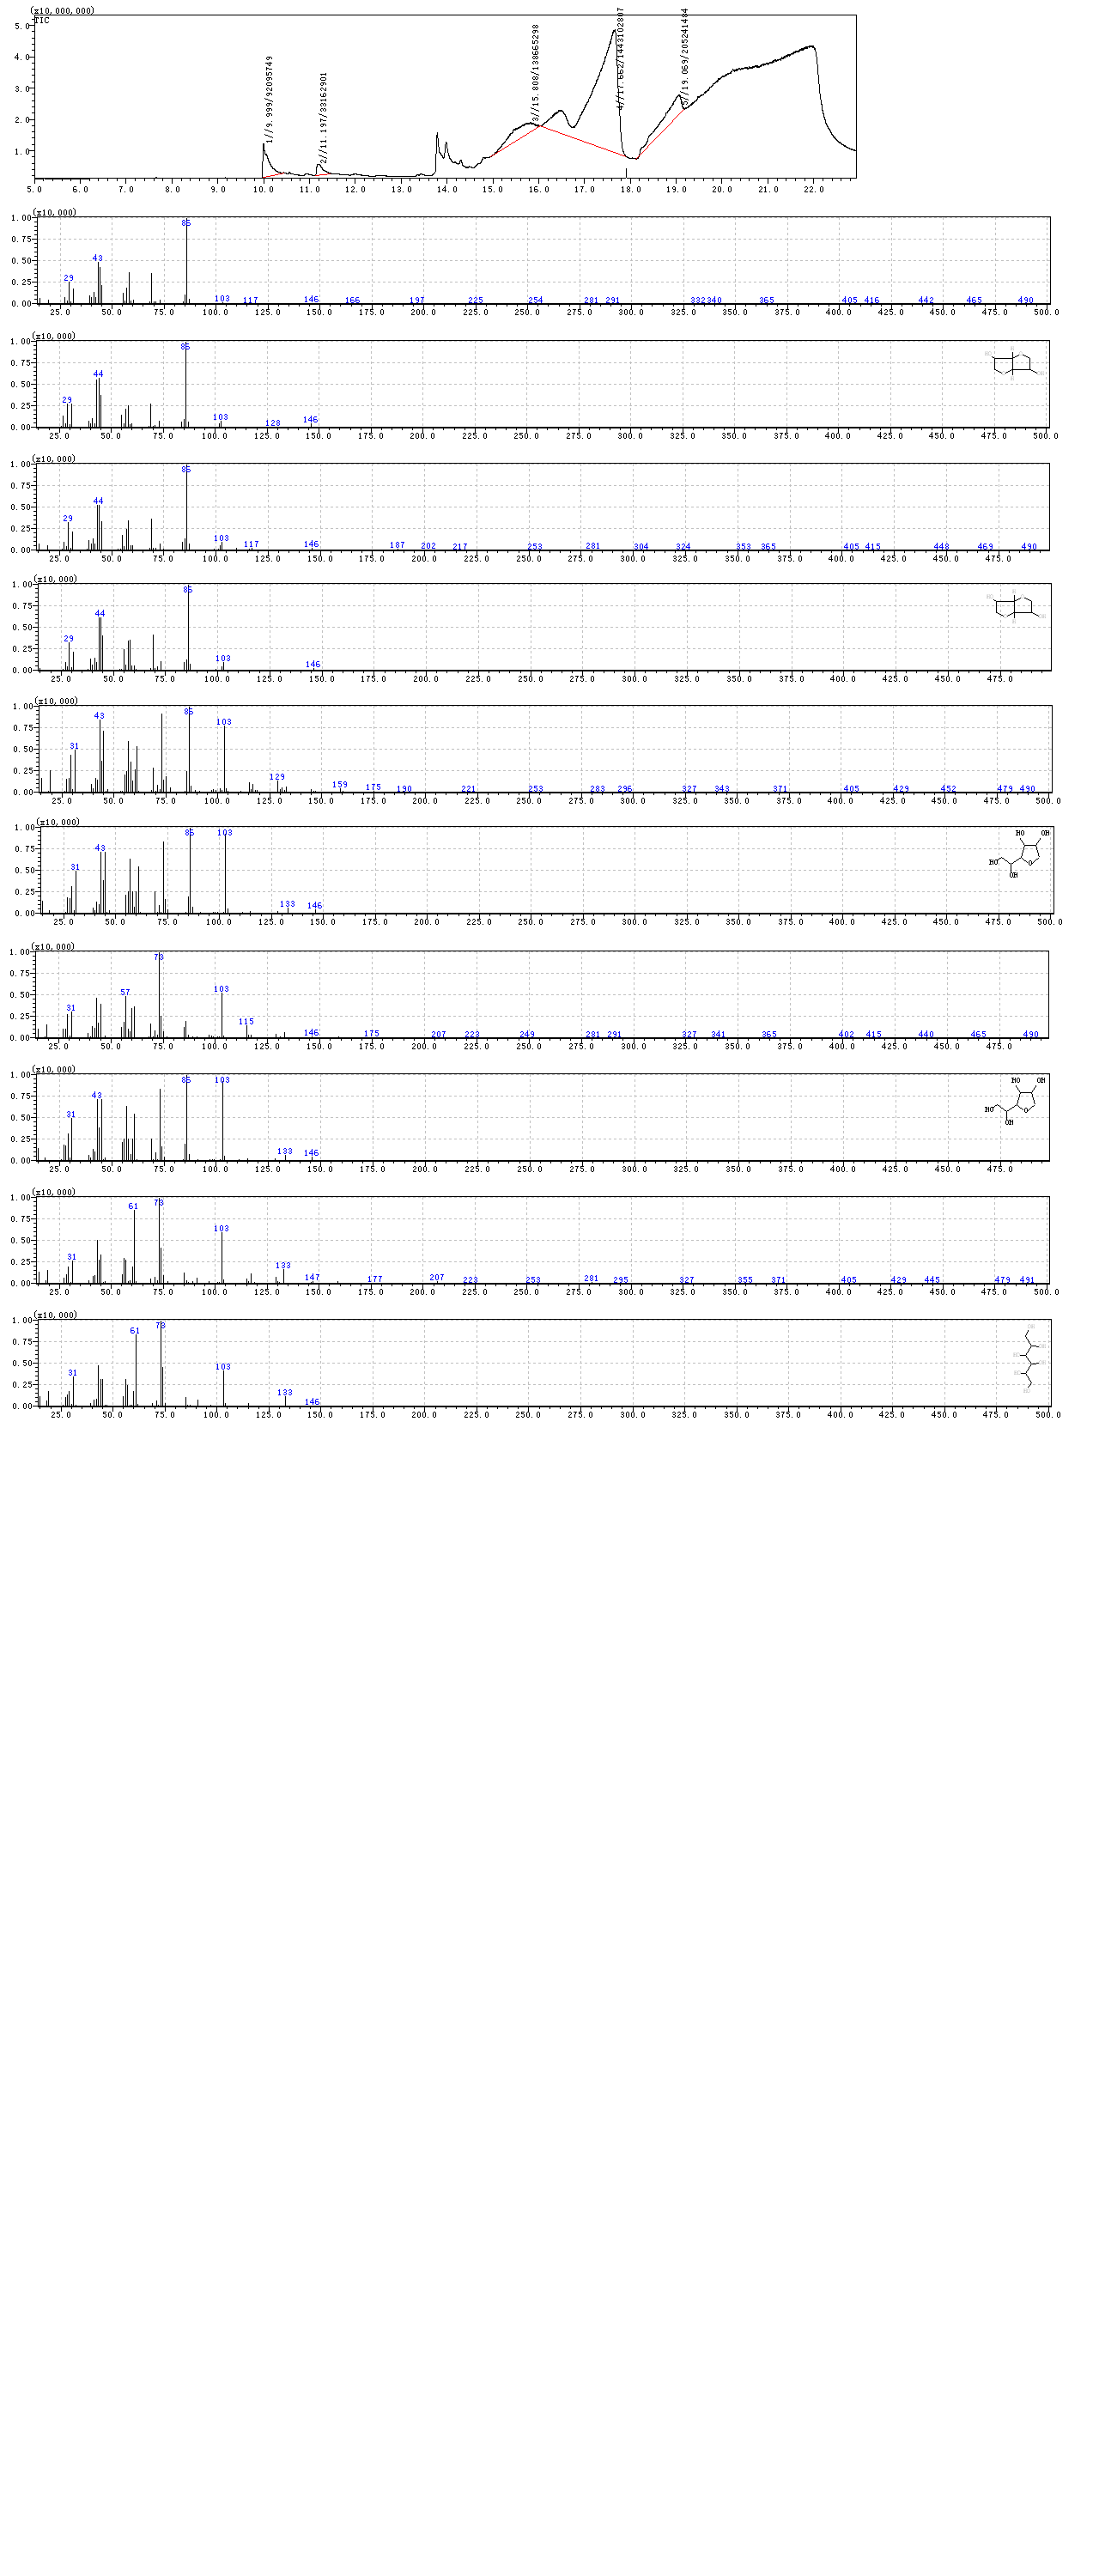


GC-MS: calcd. for C6H14O6 182, found 147 (C6H14O6 – H2O - OH).

**Reference**

[a] Shibata, K., Kiyoura, T., Kitagawa, J., Sumiyoshi, T., Tanabe, K.: Acidic properties of binary metal oxides. Bull. Chem. Soc. Jpn. **46**, 2985-2988 (1973)
